# Supplementary material for: Exploring Stamped Stoneware Production Modes in Maqiao Culture Society: Evidence from the Zhangshan Site in Zhejiang, China
Source: Research Square preprint supplement (doi:10.21203/rs.3.rs-8404476/v1), 2025-12-29
Supplement: Supplementary file 1 [file f02ed818e49ee7fd6e5eb5f0.docx]

**Appendix 1.** Analyzed Samples

| **No.** | **Site** | **Type** | **Sample ID** |
| --- | --- | --- | --- |
| 1 | ZS | Proto-porcelain | T83③:s1 |
| 2 | ZS | Proto-porcelain | T83H31①:4 |
| 3 | ZS | Black-glazed product | T73⑤:s1 |
| 4 | ZS | Black-glazed product | T63⑤:33 |
| 5 | ZS | Black-glazed product | T73⑤:s2 |
| 6 | ZS | Glaze-spotted stamped stoneware | T73②:1 |
| 7 | ZS | Glaze-spotted stamped stoneware | T63H24①:1 |
| 8 | ZS | Glaze-spotted stamped stoneware | T83H45①:1 |
| 9 | ZS | Glaze-spotted stamped stoneware | T93H53①:9 |
| 10 | ZS | Glaze-spotted stamped stoneware | T93H42①:108 |
| 11 | ZS | Glaze-spotted stamped stoneware | T83H31①:1 |
| 12 | ZS | Glaze-spotted stamped stoneware | T93H52①:14 |
| 13 | ZS | Glaze-spotted stamped stoneware | T63H36①:18 |
| 14 | ZS | Glaze-spotted stamped stoneware | T93H42①:104 |
| 15 | ZS | Glaze-spotted stamped stoneware | T93H42①:100 |
| 16 | ZS | Glaze-spotted stamped stoneware | T93H42①:101 |
| 17 | ZS | Glaze-spotted stamped stoneware | T93H42①:102 |
| 18 | ZS | Glaze-spotted stamped stoneware | T93H52①:12 |
| 19 | ZS | Glaze-spotted stamped stoneware | T73H40①:3 |
| 20 | ZS | Glaze-spotted stamped stoneware | T73⑤:1 |
| 21 | ZS | Glaze-spotted stamped stoneware | T83③:61 |
| 22 | ZS | Glaze-spotted stamped stoneware | T83③:63 |
| 23 | ZS | Brown stamped stoneware | T63H36①:14 |
| 24 | ZS | Brown stamped stoneware | T63H36①:15 |
| 25 | ZS | Brown stamped stoneware | T63H36①:16 |
| 26 | ZS | Brown stamped stoneware | T73⑤:s3 |
| 27 | ZS | Brown stamped stoneware | T83H31②:s1 |
| 28 | ZS | Brown stamped stoneware | T83H38①:s2 |
| 29 | ZS | Brown stamped stoneware | T93H52①:s2 |
| 30 | ZS | Brown stamped stoneware | T93H52①:s3 |
| 31 | ZS | Red stamped stoneware | T93H42①:109 |
| 32 | ZS | Red stamped stoneware | T93H53①:s1 |
| 33 | ZS | Red stamped stoneware | T83H45①:s1 |
| 34 | ZS | Red stamped stoneware | T63⑤:s1 |
| 35 | ZS | Red stamped stoneware | T83③:s2 |
| 36 | ZS | Grey stamped stoneware | T93H42①:s2 |
| 37 | ZS | Grey stamped stoneware | T83H38①:s1 |
| 38 | ZS | Grey stamped stoneware | T73⑤:s6 |
| 39 | ZS | Grey stamped stoneware | T83H45①:s2 |
| 40 | ZS | Grey stamped stoneware | T53③:s1 |
| 41 | ZS | Underfired stamped stoneware | T93H53①:s2 |
| 42 | ZS | Underfired stamped stoneware | T63H35①:25 |
| 43 | ZS | Underfired stamped stoneware | T73⑤:s4 |
| 44 | ZS | Underfired stamped stoneware | T73⑤:7 |
| 45 | ZS | Underfired stamped stoneware | T73⑤:6 |
| 46 | ZS | Red underfired stamped stoneware | T93H42①:s1 |
| 47 | ZS | Red underfired stamped stoneware | T93H43①:s1 |
| 48 | ZS | Red underfired stamped stoneware | T63⑤:s2 |
| 49 | ZS | Red underfired stamped stoneware | T83③:s3 |
| 50 | ZS | Red underfired stamped stoneware | T93②:s1 |
| 51 | ZS | Grey underfired stamped stoneware | T93H42①:s3 |
| 52 | ZS | Grey underfired stamped stoneware | T93H52①:s1 |
| 53 | ZS | Grey underfired stamped stoneware | T73H40①:s1 |
| 54 | ZS | Grey underfired stamped stoneware | T73⑤:s5 |
| 55 | ZS | Grey underfired stamped stoneware | T83H45①:s3 |
| 56 | ZS | Grey fine pottery bowl | T93H42①:112 |
| 57 | ZS | Grey fine pottery bowl | T93H42①:124 |
| 58 | ZS | Grey fine pottery bowl | T93H42①:117 |
| 59 | ZS | Grey fine pottery bowl | T93H42①:119 |
| 60 | ZS | Grey fine pottery bowl | T63H35①:18 |
| 61 | ZS | Grey fine pottery bowl | T73⑤:29 |
| 62 | ZS | Grey fine pottery bowl | T73⑤:30 |
| 63 | ZS | Grey fine pottery bowl | T73⑤:21 |
| 64 | ZS | Grey fine pottery bowl | T83③:68 |
| 65 | ZS | Grey fine pottery bowl | T53③:7 |
| 66 | ZS | Grey fine pottery *Dou* | T93H42①:7 |
| 67 | ZS | Grey fine pottery *Dou* | T73H49①:3 |
| 68 | ZS | Grey fine pottery *Dou* | T93H42①:125 |
| 69 | ZS | Grey fine pottery *Dou* | T53③:2 |
| 70 | ZS | Grey fine pottery *Dou* | T53③:3 |
| 71 | MH | Stamped stoneware | 22XMH:1 |
| 72 | MH | Stamped stoneware | 22XMH:21 |
| 73 | MH | Stamped stoneware | 22XMH:50 |
| 74 | MH | Stamped stoneware | 22XMH:120 |
| 75 | MH Kiln Site | Stamped stoneware | 2024XMHY1:1 |
| 76 | MH Kiln Site | Stamped stoneware | 2024XMHY1:2 |
| 77 | MH Kiln Site | Stamped stoneware | 2024XMHY1:3 |
| 78 | MH Kiln Site | Stamped stoneware | 2024XMHY1:4 |
| 79 | MH Kiln Site | Stamped stoneware | 2024XMHY1:5 |
| 80 | MH Kiln Site | Stamped stoneware | 2024XMHY1:6 |
| 81 | MH Kiln Site | Stamped stoneware | 2024XMHY1:7 |
| 82 | MH Kiln Site | Stamped stoneware | 2024XMHY1:8 |
| 83 | MH Kiln Site | Stamped stoneware | 2024XMHY1:9 |
| 84 | MH Kiln Site | Stamped stoneware | 2024XMHY1:10 |
| 85 | MH Kiln Site | Stamped stoneware | 2024XMHY1:11 |
| 86 | MH Kiln Site | Stamped stoneware | 2024XMHY1:12 |
| 87 | MH Kiln Site | Stamped stoneware | 2024XMHY1:13 |
| 88 | MH Kiln Site | Stamped stoneware | 2024XMHY1:14 |
| 89 | MH Kiln Site | Stamped stoneware | 2024XMHY1:15 |
| 90 | MH Kiln Site | Stamped stoneware | 2024XMHY1:16 |
| 91 | MH Kiln Site | Stamped stoneware | 2024XMHY1:17 |
| 92 | MH Kiln Site | Stamped stoneware | 2024XMHY1:18 |
| 93 | MH Kiln Site | Stamped stoneware | 2024XMHY1:19 |
| 94 | MH Kiln Site | Stamped stoneware | 2024XMHY1:20 |
| 95 | MH Kiln Site | Stamped stoneware | 2024XMHY1:21 |
| 96 | MH Kiln Site | Stamped stoneware | 2024XMHY1:22 |
| 97 | MH Kiln Site | Stamped stoneware | 2024XMHY1:23 |
| 98 | MH Kiln Site | Stamped stoneware | 2024XMHY1:24 |
| 99 | MH Kiln Site | Stamped stoneware | 2024XMHY1:25 |
| 100 | MH Kiln Site | Stamped stoneware | 2024XMHY1:26 |
| 101 | MH Kiln Site | Stamped stoneware | 2024XMHY1:27 |
| 102 | KSG Kiln Site | Stamped stoneware | 23DYTN21E38③:116-2 |
| 103 | KSG Kiln Site | Stamped stoneware | 23DYY1:1 |
| 104 | KSG Kiln Site | Stamped stoneware | 23DYY1:2 |
| 105 | KSG Kiln Site | Stamped stoneware | 23DYY1:3 |
| 106 | KSG Kiln Site | Stamped stoneware | 23DYY1:4 |
| 107 | KSG Kiln Site | Stamped stoneware | 23DYY1:5 |
| 108 | KSG Kiln Site | Stamped stoneware | 23DYY1:6 |
| 109 | KSG Kiln Site | Stamped stoneware | 23DYD1:1 |
| 110 | KSG Kiln Site | Stamped stoneware | 23DYD1:2 |
| 111 | KSG Kiln Site | Stamped stoneware | 23DYD1:3 |
| 112 | KSG Kiln Site | Stamped stoneware | 23DYD1:4 |
| 113 | KSG Kiln Site | Stamped stoneware | 23DYD1:5 |
| 114 | KSG Kiln Site | Stamped stoneware | 23DYD1:6 |
| 115 | KSG Kiln Site | Stamped stoneware | 23DYD1:7 |
| 116 | KSG Kiln Site | Stamped stoneware | 23DYD1:8 |
| 117 | KSG Kiln Site | Stamped stoneware | 23DYD1:9 |


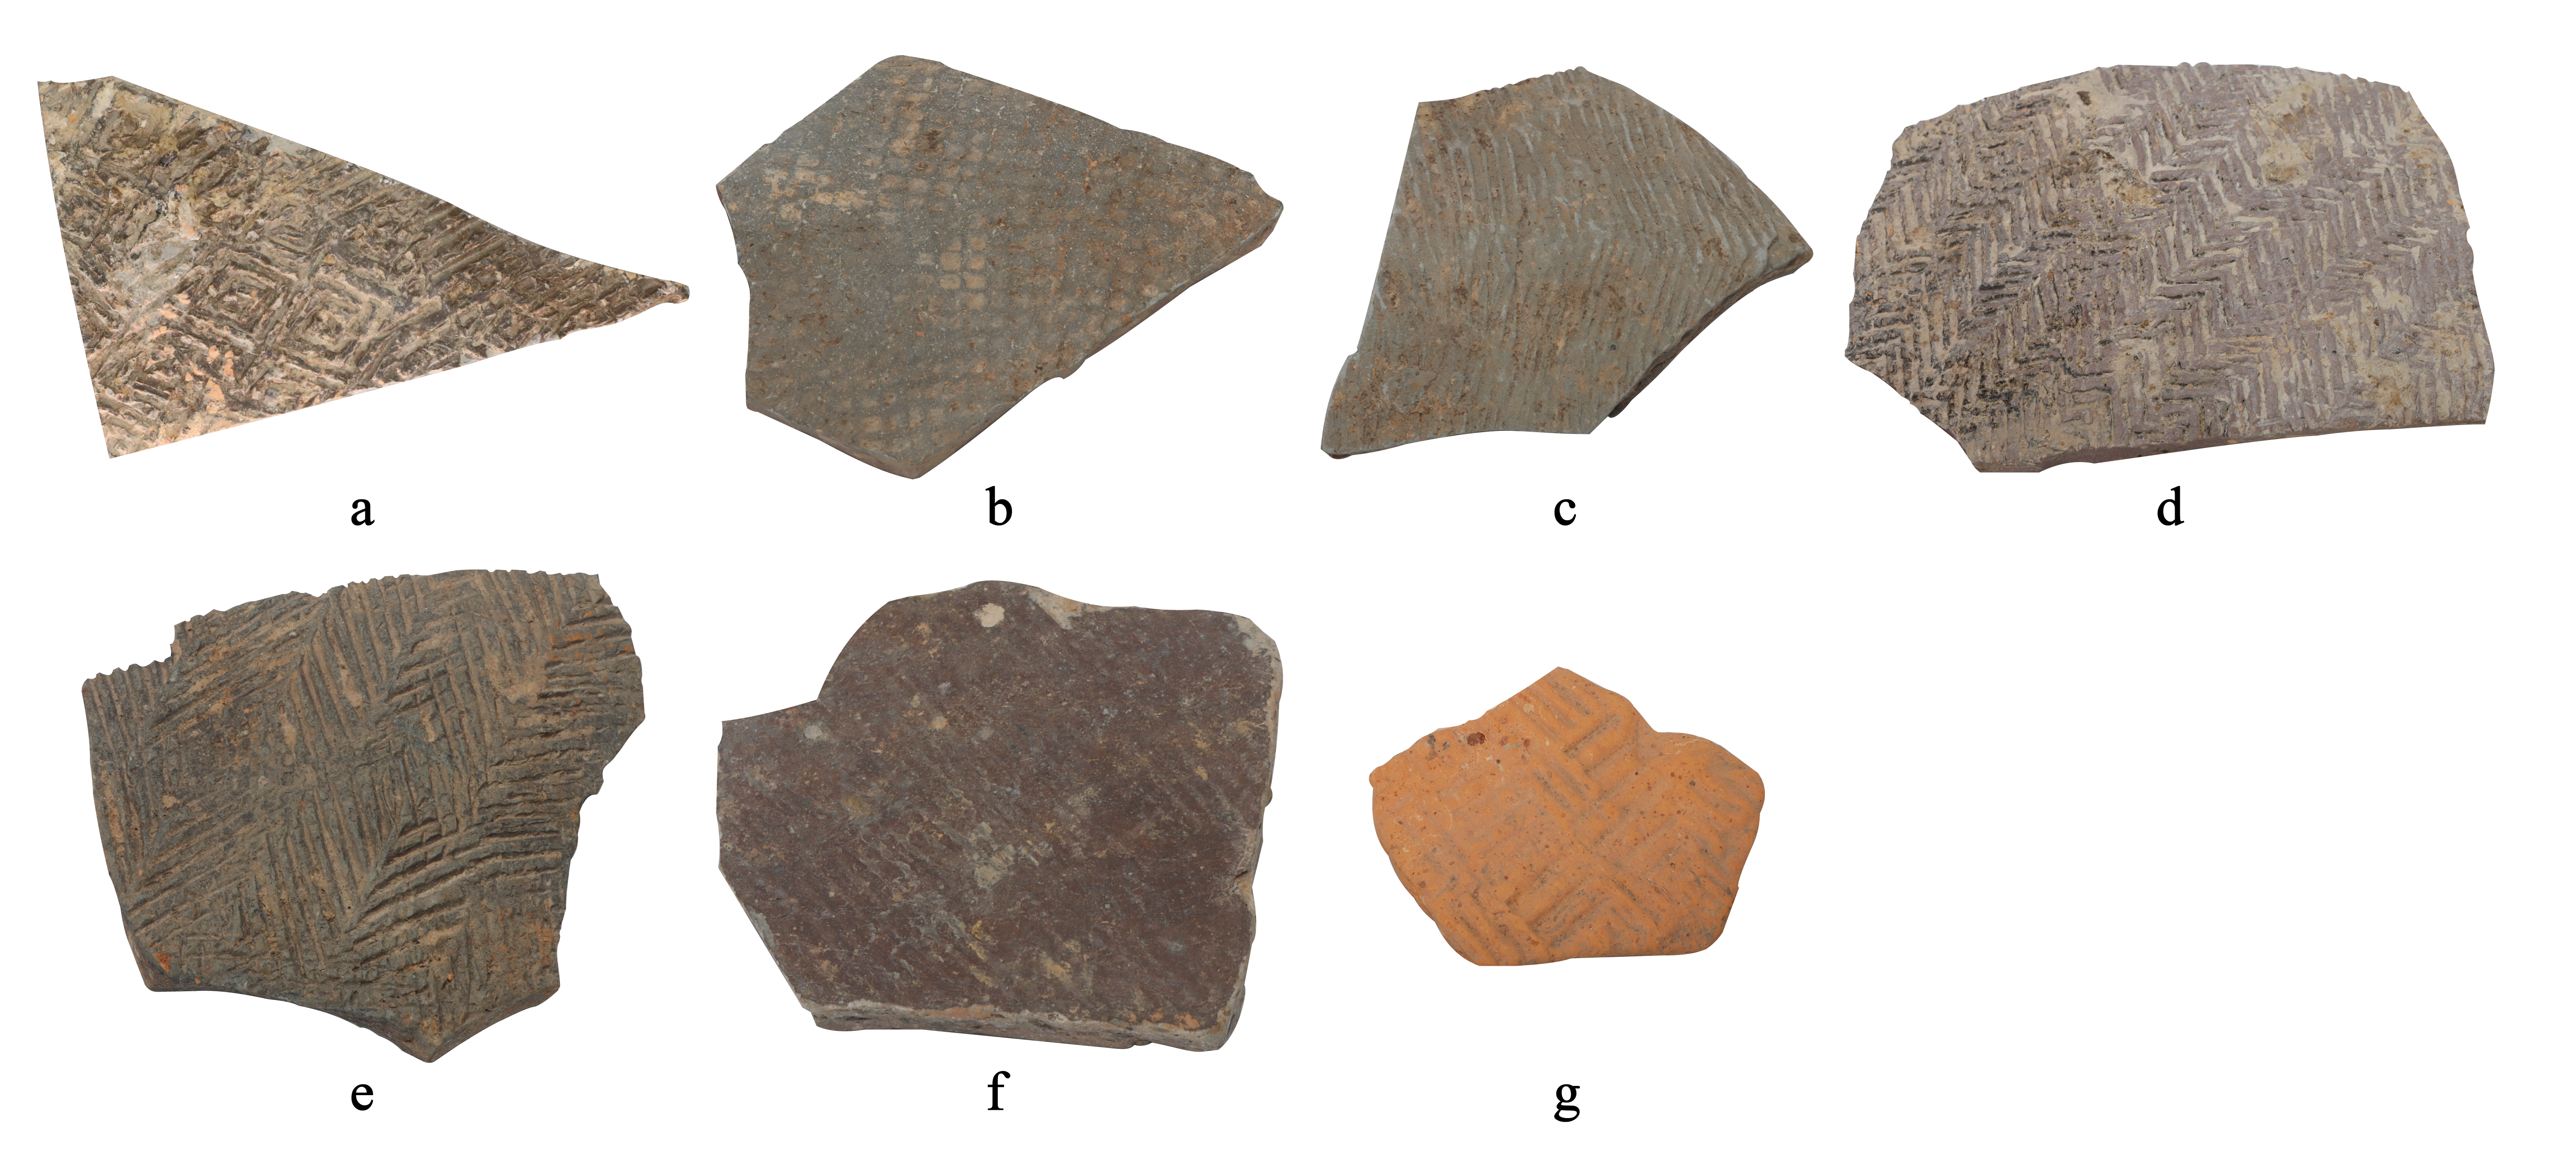


**Appendix 2.** Ornaments of ZS stamped stoneware

**a** Cloud-and-Thunder (T83H38①:s2); **b** Grid (T63H36①:16); **c** Line (T73⑤:s6); **d** Zigzag (T83H31②:s1); **e** Leaf Vein (T63⑤:r1); **f** Cord (T73⑤:r1); **g** Mat (T93H42①:s1).

**Appendix 3.** Trace element compositions (ppm)

| **Site** | **Type** | **Sample ID** | **Ti** | **V** | **Mn** | **Fe** | **Zn** | **Rb** | **Sr** | **Zr** | **Pb** | **Th** |
| --- | --- | --- | --- | --- | --- | --- | --- | --- | --- | --- | --- | --- |
| ZS | Proto-porcelain | T83③:s1 | 6921 | 142 | 343 | 29195 | 200 | 133 | 69 | 293 | 37 | 43 |
| T83H31①:4 | 5801 | 147 | 187 | 37173 | 193 | 125 | 77 | 308 | 34 | 40 |
| Black-glazed product | T73⑤:s1 | 6618 | 118 | 397 | 56049 | 97 | 105 | 123 | 265 | 40 | 41 |
| T63⑤:33 | 5997 | 137 | 244 | 37021 | 119 | 150 | 105 | 279 | 37 | 33 |
| T73⑤:s2 | 5872 | 108 | 189 | 32628 | 150 | 129 | 98 | 306 | 39 | 50 |
| Glaze-spotted stamped stoneware | T73②:1 | 6213 | 93 | 201 | 32321 | 85 | 123 | 71 | 306 | 32 | 41 |
| T63H24①:1 | 5656 | 133 | 435 | 39455 | 143 | 160 | 81 | 233 | 40 | 40 |
| T83H45①:1 | 7053 | 95 | 412 | 36575 | 164 | 137 | 62 | 263 | 38 | 52 |
| T93H53①:9 | 6404 | 92 | 188 | 31877 | 130 | 129 | 92 | 292 | 35 | 52 |
| T93H42①:108 | 7644 | 148 | 102 | 45808 | 112 | 112 | 81 | 252 | 32 | 41 |
| T83H31①:1 | 5801 | 110 | 181 | 29713 | 121 | 139 | 103 | 270 | 37 | 63 |
| T93H52①:14 | 5436 | 98 | 143 | 43194 | 133 | 128 | 98 | 262 | 40 | 55 |
| T63H36①:18 | 6417 | 120 | 148 | 27950 | 74 | 100 | 58 | 285 | 29 | 36 |
| T93H42①:104 | 5342 | 167 | 310 | 36972 | 204 | 119 | 94 | 247 | 42 | 67 |
| T93H42①:100 | 6031 | 89 | 536 | 29976 | 94 | 105 | 112 | 329 | 27 | 41 |
| T93H42①:101 | 5845 | 163 | 159 | 28802 | 170 | 127 | 109 | 250 | 43 | 54 |
| T93H42①:102 | 7889 | 140 | 163 | 49269 | 125 | 138 | 96 | 268 | 39 | 39 |
| T93H52①:12 | 5475 | 104 | 113 | 38536 | 113 | 118 | 90 | 264 | 34 | 39 |
| T73H40:3 | 5813 | 137 | 203 | 53081 | 131 | 128 | 81 | 267 | 34 | 54 |
| T73⑤:1 | 6417 | 147 | 166 | 30809 | 108 | 139 | 85 | 317 | 39 | 44 |
| T83③:61 | 6554 | 153 | 239 | 24559 | 162 | 138 | 61 | 254 | 37 | 44 |
| T83③:63 | 5435 | 86 | 396 | 36369 | 141 | 154 | 79 | 230 | 36 | 42 |
| Stamped stoneware | T63H36①:14 | 6297 | 127 | 229 | 43288 | 134 | 116 | 70 | 253 | 31 | 49 |
| T63H36①:15 | 6057 | 116 | 249 | 41652 | 126 | 112 | 66 | 242 | 33 | 55 |
| T63H36①:16 | 6333 | 135 | 263 | 47166 | 153 | 117 | 70 | 255 | 34 | 45 |
| T73⑤:s3 | 5584 | 115 | 177 | 37907 | 127 | 134 | 109 | 248 | 36 | 51 |
| T83H31②:s1 | 5686 | 123 | 306 | 40623 | 213 | 142 | 95 | 262 | 40 | 55 |
| T93H42①:109 | 5706 | 171 | 241 | 44595 | 183 | 131 | 87 | 218 | 38 | 54 |
| T93H53①:s1 | 6187 | 94 | 171 | 46469 | 120 | 127 | 90 | 219 | 36 | 29 |
| T83H45①:s1 | 5364 | 98 | 229 | 40817 | 121 | 128 | 94 | 229 | 33 | 46 |
| T63⑤:s1 | 5888 | 117 | 471 | 34654 | 94 | 138 | 86 | 293 | 40 | 51 |
| T83③:s2 | 5653 | 85 | 148 | 37901 | 156 | 122 | 99 | 248 | 36 | 55 |
| T93H42①:s2 | 6074 | 142 | 340 | 36219 | 166 | 152 | 104 | 238 | 43 | 61 |
| T83H38①:s1 | 5822 | 111 | 134 | 43240 | 162 | 157 | 90 | 205 | 38 | 50 |
| T73⑤:s6 | 6690 | 120 | 387 | 45027 | 149 | 106 | 54 | 300 | 30 | 43 |
| T83H45①:s2 | 6641 | 82 | 95 | 22804 | 87 | 127 | 73 | 374 | 31 | 45 |
| T53③:s1 | 5952 | 81 | 240 | 42183 | 105 | 117 | 70 | 249 | 32 | 51 |
| T93H53①:s2 | 6109 | 80 | 159 | 39794 | 151 | 111 | 92 | 267 | 33 | 47 |
| T63H35①:25 | 6100 | 103 | 151 | 38273 | 115 | 100 | 96 | 252 | 39 | 54 |
| T73⑤:s4 | 5781 | 116 | 277 | 32496 | 203 | 93 | 86 | 268 | 42 | 52 |
| T73⑤:7 | 6261 | 125 | 352 | 48435 | 151 | 155 | 110 | 248 | 35 | 42 |
| T73⑤:6 | 6831 | 126 | 157 | 38139 | 116 | 101 | 91 | 263 | 43 | 56 |
| T93H42①:s1 | 5718 | 125 | 270 | 42322 | 192 | 99 | 82 | 248 | 31 | 46 |
| T93H43①:s1 | 5908 | 126 | 294 | 35808 | 217 | 86 | 96 | 271 | 38 | 54 |
| T63⑤:s2 | 6745 | 117 | 417 | 51245 | 225 | 103 | 81 | 252 | 37 | 43 |
| T83③:s3 | 6441 | 140 | 83 | 39344 | 157 | 89 | 94 | 294 | 40 | 56 |
| T93②:s1 | 5528 | 89 | 181 | 34754 | 143 | 127 | 100 | 245 | 36 | 49 |
| T93H42①:s3 | 5556 | 114 | 196 | 31510 | 155 | 139 | 101 | 236 | 33 | 42 |
| T93H52①:s1 | 5421 | 89 | 226 | 35477 | 152 | 110 | 97 | 272 | 31 | 47 |
| T73H40①:s1 | 7347 | 150 | 241 | 37764 | 216 | 104 | 81 | 288 | 43 | 56 |
| T73⑤:s5 | 5970 | 135 | 216 | 37157 | 192 | 123 | 97 | 267 | 33 | 52 |
| T83H45①:s3 | 6528 | 124 | 211 | 28040 | 82 | 121 | 67 | 312 | 32 | 41 |
| T83H38①:s2 | 5962 | 135 | 264 | 34078 | 127 | 150 | 102 | 250 | 34 | 48 |
| T93H52①:s2 | 5166 | 145 | 168 | 37287 | 144 | 122 | 97 | 246 | 39 | 66 |
| T93H52①:s3 | 5593 | 131 | 238 | 39595 | 131 | 121 | 91 | 263 | 35 | 44 |
| Grey fine pottery | T93H42①:112 | 5326 | 91 | 123 | 28944 | 194 | 103 | 125 | 233 | 31 | 43 |
| T93H42①:124 | 5195 | 130 | 218 | 29625 | 122 | 145 | 93 | 230 | 33 | 41 |
| T93H42①:117 | 5637 | 120 | 205 | 31242 | 163 | 118 | 135 | 219 | 38 | 48 |
| T93H42①:119 | 5095 | 87 | 310 | 29652 | 179 | 107 | 132 | 213 | 32 | 30 |
| T63H35①:18 | 4870 | 114 | 319 | 37928 | 169 | 111 | 82 | 197 | 29 | 29 |
| T73⑤:29 | 4981 | 99 | 272 | 33197 | 123 | 92 | 132 | 226 | 30 | 61 |
| T73⑤:30 | 4855 | 87 | 420 | 28691 | 121 | 104 | 92 | 189 | 34 | 38 |
| T73⑤:21 | 6137 | 120 | 443 | 41067 | 160 | 141 | 100 | 225 | 46 | 54 |
| T83③:68 | 5018 | 85 | 274 | 28659 | 136 | 92 | 163 | 237 | 31 | 48 |
| T53③:7 | 6385 | 111 | 228 | 48888 | 162 | 109 | 95 | 268 | 39 | 42 |
| T93H42①:7 | 5552 | 129 | 243 | 30559 | 232 | 124 | 114 | 194 | 37 | 46 |
| T73H49①:3 | 5623 | 102 | 353 | 43261 | 150 | 120 | 144 | 240 | 40 | 40 |
| T93H42①:125 | 4821 | 114 | 301 | 28062 | 238 | 144 | 146 | 224 | 33 | 47 |
| T53③:2 | 5264 | 92 | 507 | 40059 | 155 | 100 | 110 | 214 | 39 | 45 |
| T53③:3 | 5295 | 132 | 307 | 31544 | 158 | 139 | 89 | 202 | 35 | 47 |
| MH | Stamped stoneware | 22XMH:1 | 5827 | 116 | 256 | 29542 | 118 | 108 | 92 | 340 | 27 | 40 |
| 22XMH:21 | 5912 | 110 | 64 | 30792 | 71 | 101 | 39 | 302 | 28 | 40 |
| 22XMH:50 | 11324 | 180 | 414 | 46043 | 104 | 65 | 74 | 290 | 24 | 38 |
| 22XMH:120 | 10116 | 222 | 264 | 44438 | 107 | 53 | 50 | 314 | 26 | 38 |
| MH Kiln Site | Stamped stoneware | 24XMHY1:1 | 9352 | 174 | 136 | 24605 | 118 | 61 | 51 | 336 | 30 | 52 |
| 24XMHY1:2 | 10585 | 137 | 137 | 31350 | 105 | 46 | 40 | 396 | 35 | 46 |
| 24XMHY1:3 | 10182 | 130 | 148 | 31723 | 89 | 65 | 61 | 355 | 32 | 30 |
| 24XMHY1:4 | 11140 | 245 | 144 | 42408 | 94 | 54 | 56 | 368 | 39 | 34 |
| 24XMHY1:5 | 6223 | 85 | 469 | 41655 | 115 | 86 | 59 | 287 | 29 | 35 |
| 24XMHY1:6 | 9315 | 120 | 291 | 43519 | 105 | 77 | 56 | 269 | 29 | 34 |
| 24XMHY1:7 | 8085 | 233 | 358 | 40234 | 122 | 63 | 54 | 296 | 28 | 49 |
| 24XMHY1:8 | 6610 | 145 | 744 | 43190 | 145 | 89 | 84 | 300 | 34 | 29 |
| 24XMHY1:9 | 12338 | 174 | 305 | 38500 | 122 | 25 | 25 | 437 | 33 | 37 |
| 24XMHY1:10 | 9619 | 174 | 159 | 35852 | 89 | 70 | 70 | 337 | 33 | 52 |
| 24XMHY1:11 | 10418 | 217 | 124 | 56879 | 115 | 50 | 46 | 361 | 31 | 43 |
| 24XMHY1:12 | 10725 | 150 | 211 | 31553 | 111 | 49 | 41 | 397 | 30 | 53 |
| 24XMHY1:13 | 9520 | 211 | 183 | 48725 | 129 | 58 | 48 | 312 | 32 | 51 |
| 24XMHY1:14 | 10378 | 153 | 198 | 42521 | 114 | 53 | 40 | 358 | 26 | 43 |
| 24XMHY1:15 | 11560 | 182 | 277 | 49158 | 131 | 51 | 39 | 365 | 39 | 39 |
| 24XMHY1:16 | 8669 | 165 | 3905 | 40143 | 93 | 41 | 37 | 349 | 26 | 48 |
| 24XMHY1:17 | 10588 | 249 | 194 | 44461 | 89 | 52 | 51 | 340 | 33 | 57 |
| 24XMHY1:18 | 11059 | 163 | 206 | 45444 | 88 | 48 | 51 | 343 | 33 | 61 |
| 24XMHY1:19 | 11459 | 139 | 284 | 35561 | 75 | 57 | 59 | 343 | 19 | 30 |
| 24XMHY1:20 | 10990 | 239 | 137 | 32796 | 109 | 49 | 50 | 386 | 40 | 52 |
| 24XMHY1:21 | 11023 | 216 | 170 | 45392 | 99 | 42 | 39 | 397 | 34 | 36 |
| 24XMHY1:22 | 10350 | 229 | 227 | 45159 | 123 | 54 | 39 | 344 | 39 | 49 |
| 24XMHY1:23 | 9541 | 209 | 127 | 41367 | 101 | 48 | 44 | 356 | 31 | 54 |
| 24XMHY1:24 | 11749 | 208 | 306 | 37315 | 100 | 52 | 55 | 358 | 22 | 46 |
| 24XMHY1:25 | 11064 | 239 | 489 | 52054 | 112 | 26 | 21 | 400 | 46 | 39 |
| 24XMHY1:26 | 11277 | 222 | 167 | 46196 | 62 | 51 | 54 | 334 | 28 | 39 |
| 24XMHY1:27 | 10725 | 170 | 213 | 42826 | 125 | 63 | 74 | 345 | 34 | 37 |
| KSG Kiln Site | Stamped stoneware | 23DYTN21E38③:116-2 | 5562 | 123 | 196 | 36335 | 94 | 146 | 88 | 261 | 28 | 51 |
| 23DYY1:1 | 6148 | 134 | 199 | 41738 | 115 | 115 | 70 | 278 | 33 | 49 |
| 23DYY1:2 | 5663 | 166 | 220 | 50987 | 91 | 101 | 71 | 303 | 32 | 48 |
| 23DYY1:3 | 5997 | 146 | 299 | 48636 | 89 | 103 | 71 | 306 | 31 | 39 |
| 23DYY1:4 | 6068 | 89 | 78 | 46814 | 106 | 95 | 76 | 284 | 33 | 57 |
| 23DYY1:5 | 5885 | 95 | 247 | 40105 | 100 | 105 | 72 | 286 | 30 | 59 |
| 23DYY1:6 | 5844 | 95 | 142 | 44922 | 121 | 120 | 73 | 267 | 40 | 51 |
| 23DYD1:1 | 5502 | 137 | 346 | 44843 | 123 | 125 | 95 | 245 | 31 | 46 |
| 23DYD1:2 | 5813 | 125 | 212 | 39508 | 137 | 143 | 91 | 259 | 28 | 43 |
| 23DYD1:3 | 6033 | 97 | 168 | 33726 | 93 | 130 | 79 | 285 | 33 | 58 |
| 23DYD1:4 | 5713 | 113 | 145 | 38951 | 112 | 140 | 95 | 243 | 30 | 48 |
| 23DYD1:5 | 5879 | 106 | 169 | 33877 | 107 | 132 | 77 | 292 | 36 | 45 |
| 23DYD1:6 | 5646 | 114 | 198 | 39521 | 101 | 127 | 77 | 270 | 31 | 54 |
| 23DYD1:7 | 5168 | 79 | 329 | 39705 | 97 | 125 | 99 | 232 | 30 | 50 |
| 23DYD1:8 | 5851 | 91 | 197 | 50742 | 132 | 126 | 81 | 276 | 35 | 54 |
| 23DYD1:9 | 5606 | 111 | 158 | 33526 | 131 | 138 | 99 | 260 | 28 | 49 |

**Appendix 4.** Principal component scores of Group 1

| **Type** | **Sample ID** | **PC1** | **PC2** |
| --- | --- | --- | --- |
| Proto-porcelain | T83③:s1 | 1.04417 | 0.47928 |
| T83H31①:4 | 0.72585 | 0.15690 |
| Black-glazed product | T73⑤:s1 | 0.70048 | -0.10134 |
| T63⑤:33 | 0.42084 | -0.55306 |
| T73⑤:s2 | 0.21223 | 0.28166 |
| Glaze-spotted stamped stoneware | T73②:1 | 1.12507 | -1.58658 |
| T63H24①:1 | -0.08979 | 0.02042 |
| T83H45①:1 | 0.93670 | 0.13326 |
| T93H53①:9 | 0.48444 | -0.33031 |
| T93H42①:108 | 1.97585 | -0.17848 |
| T83H31①:1 | -0.26827 | 0.56207 |
| T93H52①:14 | -0.18531 | 0.49331 |
| T63H36①:18 | 1.44712 | -1.81462 |
| T93H42①:104 | -0.62270 | 2.58954 |
| T93H42①:100 | 0.16472 | -2.28412 |
| T93H42①:101 | -0.37294 | 1.84706 |
| T93H42①:102 | 1.99183 | 0.40058 |
| T93H52①:12 | 0.13177 | -0.98812 |
| T73H40:3 | 0.79782 | 0.43563 |
| T73⑤:1 | 1.30039 | 0.21786 |
| T83③:61 | 0.77778 | 0.40990 |
| T83③:63 | -0.54744 | -0.95393 |
| Unglazed stamped stoneware | T63H36①:14 | 0.86338 | -0.29613 |
| T63H36①:15 | 0.55568 | -0.07301 |
| T63H36①:16 | 0.96773 | 0.05717 |
| T73⑤:s3 | -0.41195 | 0.07367 |
| T83H31②:s1 | -0.39609 | 1.30387 |
| T93H42①:109 | -0.09482 | 1.62043 |
| T93H53①:s1 | 0.31766 | -1.24770 |
| T83H45①:s1 | -0.48304 | -0.80394 |
| T63⑤:s1 | 0.43753 | -0.10560 |
| T83③:s2 | -0.51056 | 0.08747 |
| T93H42①:s2 | -0.36594 | 1.80993 |
| T83H38①:s1 | -0.35401 | 0.51880 |
| T73⑤:s6 | 1.66481 | -0.82677 |
| T83H45①:s2 | 1.72830 | -1.63486 |
| T53③:s1 | 0.43513 | -1.01438 |
| T93H53①:s2 | 0.15812 | -0.68322 |
| T63H35①:25 | 0.17667 | 0.30916 |
| T73⑤:s4 | -0.26552 | 1.11757 |
| T73⑤:7 | 0.13631 | -0.13125 |
| T73⑤:6 | 0.93577 | 1.16894 |
| T93H42①:s1 | -0.05590 | -0.09720 |
| T93H43①:s1 | -0.28331 | 1.13624 |
| T63⑤:s2 | 0.60000 | 0.52957 |
| T83③:s3 | 0.89041 | 1.40566 |
| T93②:s1 | -0.61043 | -0.32450 |
| T93H42①:s3 | -0.65501 | -0.55890 |
| T93H52①:s1 | -0.43384 | -0.90163 |
| T73H40①:s1 | 1.25613 | 2.19677 |
| T73⑤:s5 | -0.04361 | 0.56811 |
| T83H45①:s3 | 1.52095 | -1.20793 |
| T83H38①:s2 | -0.07175 | -0.08428 |
| T93H52①:s2 | -0.52387 | 1.59810 |
| T93H52①:s3 | 0.14447 | -0.20603 |
| Grey fine pottery | T93H42①:112 | -1.54167 | -0.63818 |
| T93H42①:124 | -0.62515 | -0.72707 |
| T93H42①:117 | -1.36033 | 0.47093 |
| T93H42①:119 | -1.96471 | -1.50439 |
| T63H35①:18 | -1.04298 | -1.60283 |
| T73⑤:29 | -1.71188 | -0.34743 |
| T73⑤:30 | -1.57662 | -1.55252 |
| T73⑤:21 | -0.37055 | 1.36656 |
| T83③:68 | -2.24651 | -0.97674 |
| T53③:7 | 0.63955 | 0.22304 |
| T93H42①:7 | -1.60118 | 0.84548 |
| T73H49①:3 | -1.11815 | -0.09443 |
| T93H42①:125 | -2.55696 | 0.24605 |
| T53③:2 | -1.33764 | -0.28924 |
| T53③:3 | -0.96526 | 0.03971 |

**Appendix 5.** Principal component scores of Group 1

| **Site** | **Sample ID** | **PC1** | **PC2** |
| --- | --- | --- | --- |
| ZS | T73②:1 | -0.48863 | -1.21835 |
| T63H24①:1 | -0.88820 | 0.35611 |
| T83H45①:1 | -0.41493 | 0.67316 |
| T93H53①:9 | -0.59291 | 0.07579 |
| T93H42①:108 | -0.25816 | -0.33717 |
| T83H31①:1 | -0.66820 | 0.73453 |
| T93H52①:14 | -0.70583 | 0.95674 |
| T63H36①:18 | -0.23953 | -1.74900 |
| T93H42①:104 | -0.16882 | 2.61006 |
| T93H42①:100 | -0.88328 | -1.73694 |
| T93H42①:101 | -0.35927 | 1.73557 |
| T93H42①:102 | -0.37565 | 0.38664 |
| T93H52①:12 | -0.80364 | -0.57591 |
| T73H40:3 | -0.42873 | 0.58838 |
| T73⑤:1 | -0.11606 | 0.11414 |
| T83③:61 | -0.21623 | 0.38620 |
| T83③:63 | -1.21657 | -0.22963 |
| T63H36①:14 | -0.44407 | -0.09526 |
| T63H36①:15 | -0.42528 | 0.18682 |
| T63H36①:16 | -0.36823 | 0.30392 |
| T73⑤:s3 | -0.93402 | 0.34649 |
| T83H31②:s1 | -0.64498 | 1.80675 |
| T93H42①:109 | -0.46321 | 1.59066 |
| T93H53①:s1 | -1.12449 | -0.67394 |
| T83H45①:s1 | -1.11273 | -0.31199 |
| T63⑤:s1 | -0.46323 | 0.14770 |
| T83③:s2 | -0.89367 | 0.68342 |
| T93H42①:s2 | -0.61936 | 1.90669 |
| T83H38①:s1 | -1.07473 | 0.92087 |
| T73⑤:s6 | -0.13019 | -0.42040 |
| T83H45①:s2 | -0.17476 | -1.29517 |
| T53③:s1 | -0.73900 | -0.47092 |
| T93H53①:s2 | -0.79645 | -0.02355 |
| T63H35①:25 | -0.47593 | 0.60389 |
| T73⑤:s4 | -0.20993 | 1.63648 |
| T73⑤:7 | -1.10876 | 0.23397 |
| T73⑤:6 | -0.04823 | 1.19596 |
| T93H42①:s1 | -0.58996 | 0.37545 |
| T93H43①:s1 | -0.25144 | 1.59855 |
| T63⑤:s2 | -0.44793 | 1.21415 |
| T83③:s3 | 0.13178 | 1.45056 |
| T93②:s1 | -1.00325 | 0.23942 |
| T93H42①:s3 | -1.12584 | -0.16388 |
| T93H52①:s1 | -0.90068 | -0.26003 |
| T73H40①:s1 | 0.31016 | 2.30563 |
| T73⑤:s5 | -0.57984 | 0.83779 |
| T83H45①:s3 | -0.18917 | -1.16930 |
| T83H38①:s2 | -0.90163 | 0.00358 |
| T93H52①:s2 | -0.40922 | 1.59842 |
| T93H52①:s3 | -0.62634 | 0.02683 |
| MH | 22XMH:1 | -0.47134 | -1.32349 |
| 22XMH:21 | -0.07611 | -1.72830 |
| 22XMH:50 | 0.60947 | -1.25632 |
| 22XMH:120 | 1.21944 | -0.84911 |
| 2024XMHY1:1 | 1.16359 | -0.22930 |
| 2024XMHY1:2 | 1.63407 | -0.25139 |
| 2024XMHY1:3 | 0.80711 | -1.40386 |
| 2024XMHY1:4 | 1.98601 | 0.24070 |
| 2024XMHY1:5 | -0.48485 | -1.46573 |
| 2024XMHY1:6 | 0.11845 | -1.27647 |
| 2024XMHY1:7 | 0.99106 | -0.08424 |
| 2024XMHY1:8 | -0.27812 | -0.68041 |
| 2024XMHY1:9 | 2.34306 | -0.45701 |
| 2024XMHY1:10 | 1.03312 | -0.05402 |
| 2024XMHY1:11 | 1.70466 | 0.13741 |
| 2024XMHY1:12 | 1.62903 | -0.33282 |
| 2024XMHY1:13 | 1.34649 | 0.56802 |
| 2024XMHY1:14 | 1.20580 | -0.93531 |
| 2024XMHY1:15 | 1.82186 | 0.55683 |
| 2024XMHY1:16 | 0.22007 | -2.60401 |
| 2024XMHY1:17 | 1.93020 | 0.63552 |
| 2024XMHY1:18 | 1.54756 | 0.39203 |
| 2024XMHY1:19 | 0.66967 | -2.75143 |
| 2024XMHY1:20 | 2.30828 | 1.09671 |
| 2024XMHY1:21 | 2.06005 | -0.26007 |
| 2024XMHY1:22 | 1.95332 | 1.09622 |
| 2024XMHY1:23 | 1.67765 | 0.18703 |
| 2024XMHY1:24 | 1.47149 | -1.14368 |
| 2024XMHY1:25 | 2.71464 | 1.22139 |
| 2024XMHY1:26 | 1.51569 | -1.00175 |
| 2024XMHY1:27 | 1.04362 | -0.14676 |
| KSG | 23DYTN21E38③:116-2 | -0.90992 | -0.83273 |
| 23DYY1:1 | -0.23281 | -0.09187 |
| 23DYY1:2 | 0.06393 | -0.21202 |
| 23DYY1:3 | -0.14494 | -0.89179 |
| 23DYY1:4 | -0.29718 | 0.09064 |
| 23DYY1:5 | -0.39627 | -0.34191 |
| 23DYY1:6 | -0.41183 | 0.62487 |
| 23DYD1:1 | -0.85839 | -0.28836 |
| 23DYD1:2 | -0.97412 | -0.66409 |
| 23DYD1:3 | -0.51113 | -0.21661 |
| 23DYD1:4 | -1.03293 | -0.53603 |
| 23DYD1:5 | -0.49047 | -0.31010 |
| 23DYD1:6 | -0.58802 | -0.34553 |
| 23DYD1:7 | -1.31658 | -0.83214 |
| 23DYD1:8 | -0.61498 | 0.43410 |
| 23DYD1:9 | -1.04017 | -0.58277 |

**Appendix6.** Principal component scores of all samples from the north of Qiantang River

| **Site** | **Type** | **Sample ID** | **PC1** | **PC2** |
| --- | --- | --- | --- | --- |
| ZS | Glaze-spotted stamped stoneware | T73②:1 | 1.00405 | -1.65070 |
| T63H24①:1 | 0.12997 | 0.82724 |
| T83H45①:1 | 0.92768 | 0.66130 |
| T93H53①:9 | 0.30681 | -0.45720 |
| T93H42①:108 | 1.93781 | 0.02407 |
| T83H31①:1 | -0.42535 | 0.23721 |
| T93H52①:14 | -0.39043 | 0.32251 |
| T63H36①:18 | 1.33974 | -1.94289 |
| T93H42①:104 | -0.64844 | 2.56738 |
| T93H42①:100 | -0.02128 | -2.05560 |
| T93H42①:101 | -0.39134 | 1.80784 |
| T93H42①:102 | 2.03930 | 0.93108 |
| T93H52①:12 | -0.02040 | -1.06151 |
| T73H40:3 | 0.75982 | 0.45867 |
| T73⑤:1 | 1.35850 | 0.22583 |
| T83③:61 | 0.93354 | 0.72383 |
| T83③:63 | -0.50485 | -0.38041 |
| Unglazed stamped stoneware | T63H36①:14 | 0.80112 | -0.19470 |
| T63H36①:15 | 0.42659 | -0.08272 |
| T63H36①:16 | 0.96320 | 0.37760 |
| T73⑤:s3 | -0.52999 | 0.02730 |
| T83H31②:s1 | -0.39683 | 1.59369 |
| T93H42①:109 | -0.00472 | 1.88784 |
| T93H53①:s1 | 0.24292 | -0.73934 |
| T83H45①:s1 | -0.61158 | -0.70367 |
| T63⑤:s1 | 0.45057 | 0.22734 |
| T83③:s2 | -0.76866 | -0.09119 |
| T93H42①:s2 | -0.31191 | 2.11876 |
| T83H38①:s1 | -0.34752 | 0.76713 |
| T73⑤:s6 | 1.63958 | -0.44516 |
| T83H45①:s2 | 1.53830 | -2.10905 |
| T53③:s1 | 0.22854 | -1.03358 |
| T93H53①:s2 | -0.10966 | -0.75361 |
| T63H35①:25 | -0.12353 | 0.08621 |
| T73⑤:s4 | -0.47763 | 1.15194 |
| T73⑤:7 | 0.23263 | 0.53831 |
| T73⑤:6 | 0.70725 | 1.03916 |
| T93H42①:s1 | -0.17928 | 0.06510 |
| T93H43①:s1 | -0.51265 | 1.14870 |
| T63⑤:s2 | 0.53305 | 1.26842 |
| T83③:s3 | 0.63330 | 1.04257 |
| T93②:s1 | -0.80353 | -0.36833 |
| T93H42①:s3 | -0.68322 | -0.39150 |
| T93H52①:s1 | -0.67053 | -1.01151 |
| T73H40①:s1 | 1.17559 | 2.38169 |
| T73⑤:s5 | -0.10553 | 0.60363 |
| T83H45①:s3 | 1.49172 | -1.25404 |
| T83H38①:s2 | -0.01021 | 0.13907 |
| T93H52①:s2 | -0.65468 | 1.23835 |
| T93H52①:s3 | 0.09799 | -0.08868 |
| Grey fine pottery | T93H42①:112 | -1.84687 | -0.78135 |
| T93H42①:124 | -0.56498 | -0.55953 |
| T93H42①:117 | -1.54460 | 0.54243 |
| T93H42①:119 | -2.16855 | -1.09782 |
| T63H35①:18 | -1.05728 | -1.07477 |
| T73⑤:29 | -2.11266 | -0.74818 |
| T73⑤:30 | -1.74347 | -1.16442 |
| T73⑤:21 | -0.36250 | 1.99534 |
| T83③:68 | -2.67991 | -1.18532 |
| T53③:7 | 0.48905 | 0.52872 |
| T93H42①:7 | -1.65685 | 1.19258 |
| T73H49①:3 | -1.29253 | 0.37986 |
| T93H42①:125 | -2.61640 | 0.51972 |
| T53③:2 | -1.54371 | 0.24965 |
| T53③:3 | -0.91017 | 0.37471 |
| KSG Kiln Site | Stamped stoneware | 23DYTN21E38③:116-2 | 0.15313 | -1.04793 |
| 23DYY1:1 | 1.04883 | -0.22023 |
| 23DYY1:2 | 1.49055 | -0.17738 |
| 23DYY1:3 | 1.59110 | -0.78897 |
| 23DYY1:4 | 0.60477 | -0.80946 |
| 23DYY1:5 | 0.42064 | -1.03537 |
| 23DYY1:6 | 0.45558 | 0.06689 |
| 23DYD1:1 | -0.04774 | -0.20338 |
| 23DYD1:2 | 0.22608 | -0.76032 |
| 23DYD1:3 | 0.42757 | -0.80463 |
| 23DYD1:4 | -0.09845 | -0.82709 |
| 23DYD1:5 | 0.61685 | -0.69440 |
| 23DYD1:6 | 0.34946 | -0.75541 |
| 23DYD1:7 | -0.99851 | -1.38938 |
| 23DYD1:8 | 0.40986 | -0.17125 |
| 23DYD1:9 | -0.34869 | -1.02162 |
